# Supplementary material for: Na3YB8O15: a new rare-earth borate with an infinite one-dimensional [B8O15]∞chain and a short ultraviolet cutoff edge
Source: Royal Society of Chemistry journal article supplement (doi:10.1039/d2dt03019e), 2022-01-01
Supplement: d2dt03019e1.pdf [file d2dt03019e1.pdf]

## **Na<sub>3</sub>YB<sub>8</sub>O<sub>15</sub>: a new rare-earth borate with an infinite one-dimensional**

### **[B<sub>8</sub>O<sub>15</sub>]<sub>∞</sub> chain and short ultraviolet cutoff edge**

Jianlong Huang,<sup>a#</sup> Chengfa Wu,<sup>a#</sup> Jianbang Chen,<sup>b</sup> Zhiyong Guo,<sup>c</sup> Wenjuan Ma,<sup>a</sup> Feng Yu,<sup>a\*</sup> and Bin Dai<sup>a</sup>

<sup>a</sup>Key Laboratory for Green Processing of Chemical Engineering of XinjiangBingtuan, School of Chemistry and Chemical Engineering, Shihezi University, Shihezi 832003, China.

<sup>b</sup>Department of Physics, Changji University. Changji, Xinjiang 831100, China.

<sup>c</sup>Xuchang Quality and Technical Supervision, Inspection and Testing Center, West Section of Longxing Road, Dongcheng District, Xuchang 461000, China.

\*Corresponding author: yufeng05@mail.ipc.ac.cn.

#The authors declare no competing financial interest.

**Table S1.** Crystal data and structure refinement for Na<sub>3</sub>YB<sub>8</sub>O<sub>15</sub>.

| Empirical formula                                                  | Na <sub>3</sub> YB <sub>8</sub> O <sub>15</sub>                 |
|--------------------------------------------------------------------|-----------------------------------------------------------------|
| Formula weight                                                     | 484.36                                                          |
| Crystal system                                                     | Triclinic                                                       |
| Space group                                                        | <i>P</i> $\bar{1}$                                              |
| <i>a</i> / Å                                                       | 6.4122(2)                                                       |
| <i>b</i> / Å                                                       | 7.3634(3)                                                       |
| <i>c</i> / Å                                                       | 13.1781(5)                                                      |
| $\alpha$ / °                                                       | 89.126(2)                                                       |
| $\beta$ / °                                                        | 78.657(2)                                                       |
| $\gamma$ / °                                                       | 66.8170(10)                                                     |
| Z, pcalcd / g·cm <sup>-3</sup>                                     | 2, 2.875                                                        |
| Volume / Å <sup>3</sup>                                            | 559.46(4)                                                       |
| Theta range for data collection                                    | 1.580 to 27.517                                                 |
| Reflections collected / unique                                     | 17964 / 2545 [ <i>R</i> (int) = 0.0547]                         |
| Completeness (%)                                                   | 98.6                                                            |
| Goodness-of-fit on <i>F</i> <sup>2</sup>                           | 1.147                                                           |
| Final <i>R</i> indices [ <i>I</i> > 2σ( <i>I</i> )] <sup>[a]</sup> | <i>R</i> <sub>1</sub> = 0.0204, <i>wR</i> <sub>2</sub> = 0.0607 |
| <i>R</i> indices (all data) <sup>[a]</sup>                         | <i>R</i> <sub>1</sub> = 0.0217, <i>wR</i> <sub>2</sub> = 0.0612 |
| Largest diff. peak and hole (e·Å <sup>-3</sup> )                   | 0.381 and -0.329                                                |

<sup>[a]</sup>*R*<sub>1</sub> = Σ||*F*<sub>o</sub> - |*F*<sub>c</sub>||/Σ|*F*<sub>o</sub>| and *wR*<sub>2</sub> = [Σ*w*(*F*<sub>o</sub><sup>2</sup> - *F*<sub>c</sub><sup>2</sup>)<sup>2</sup> / Σ*w* *F*<sub>o</sub><sup>4</sup>]<sup>1/2</sup> for *F*<sub>o</sub><sup>2</sup> > 2σ(*F*<sub>o</sub><sup>2</sup>)

**Table S2** Atomic coordinates ( $\times 10^4$ ) and equivalent isotropic displacement parameters ( $\text{\AA}^2 \times 10^3$ ) for  $\text{Na}_3\text{YB}_8\text{O}_{15}$ .  $U_{\text{eq}}$  is defined as one-third of the trace of the orthogonalized  $U_{ij}$  tensor.

| Atoms | x        | y        | z        | $U_{\text{eq}}$ |
|-------|----------|----------|----------|-----------------|
| Na(1) | 10380(2) | 2696(2)  | 8884(1)  | 19(1)           |
| Na(2) | 7672(2)  | 2392(2)  | 4770(1)  | 20(1)           |
| Na(3) | 6244(2)  | 10952(2) | 7647(1)  | 21(1)           |
| Y(1)  | -1008(1) | 12512(1) | 11708(1) | 8(1)            |
| B(1)  | 6524(5)  | 6129(4)  | 10149(2) | 11(1)           |
| B(2)  | 3282(5)  | 9207(4)  | 9933(2)  | 10(1)           |
| B(3)  | 5943(4)  | 6991(4)  | 8353(2)  | 10(1)           |
| B(4)  | 9010(4)  | 6411(4)  | 6677(2)  | 9(1)            |
| B(5)  | 6314(5)  | 4805(4)  | 6842(2)  | 9(1)            |
| B(6)  | 7815(5)  | 7851(4)  | 4969(2)  | 11(1)           |
| B(7)  | 6803(4)  | 6295(4)  | 3608(2)  | 9(1)            |
| B(8)  | 8433(5)  | 8872(4)  | 3216(2)  | 11(1)           |
| O(1)  | 7874(3)  | 5031(3)  | 10758(1) | 15(1)           |
| O(2)  | 6959(3)  | 5628(2)  | 9098(1)  | 13(1)           |
| O(3)  | 4596(3)  | 7889(3)  | 10563(1) | 13(1)           |
| O(4)  | 1511(3)  | 10855(3) | 10335(1) | 15(1)           |
| O(5)  | 3865(3)  | 8715(2)  | 8868(1)  | 11(1)           |
| O(6)  | 7728(3)  | 7513(2)  | 7701(1)  | 11(1)           |
| O(7)  | 4944(3)  | 6110(3)  | 7663(1)  | 12(1)           |
| O(8)  | 8468(3)  | 4725(2)  | 6469(1)  | 10(1)           |
| O(9)  | 5569(3)  | 3538(2)  | 6429(1)  | 10(1)           |
| O(10) | 8507(3)  | 7847(2)  | 5877(1)  | 12(1)           |
| O(11) | 8304(3)  | 9170(2)  | 4283(1)  | 12(1)           |
| O(12) | 6709(3)  | 6755(2)  | 4710(1)  | 11(1)           |
| O(13) | 9548(3)  | 9699(3)  | 2523(1)  | 13(1)           |
| O(14) | 7329(3)  | 7738(2)  | 2930(1)  | 10(1)           |
| O(15) | 8502(3)  | 4258(2)  | 3280(1)  | 9(1)            |

**Table S3.** Bond distances [ $\text{\AA}$ ] and angles [ $^\circ$ ] for  $\text{Na}_3\text{YB}_8\text{O}_{15}$ .

|               |            |                        |           |
|---------------|------------|------------------------|-----------|
| Na(1)-O(1)    | 2.834(2)   | O(11)#5-Na(2)-O(10)#3  | 97.34(7)  |
| Na(1)-O(1)#2  | 2.446(2)   | O(11)#5-Na(2)-O(11)#3  | 88.99(6)  |
| Na(1)-O(2)    | 2.3661(19) | O(11)#5-Na(2)-O(12)#4  | 89.66(7)  |
| Na(1)-O(4)#1  | 2.391(2)   | O(11)#5-Na(2)-O(15)    | 112.83(7) |
| Na(1)-O(5)#1  | 2.9006(19) | O(12)#4-Na(2)-O(11)#3  | 137.96(6) |
| Na(1)-O(13)#3 | 2.559(2)   | O(15)-Na(2)-O(11)#3    | 108.79(6) |
| Na(1)-O(14)#3 | 2.4988(19) | O(15)-Na(2)-O(12)#4    | 110.35(7) |
| Na(2)-O(9)    | 2.3046(19) | O(3)#6-Na(3)-O(5)      | 72.37(6)  |
| Na(2)-O(10)#3 | 2.367(2)   | O(3)#6-Na(3)-O(9)#7    | 114.86(7) |
| Na(2)-O(11)#3 | 2.903(2)   | O(3)#6-Na(3)-O(10)     | 153.54(7) |
| Na(2)-O(11)#5 | 2.3224(19) | O(3)#6-Na(3)-O(13)#9   | 91.21(7)  |
| Na(2)-O(12)#4 | 2.573(2)   | O(5)-Na(3)-O(10)       | 93.98(5)  |
| Na(2)-O(15)   | 2.4719(19) | O(6)-Na(3)-O(3)#6      | 103.45(7) |
| Na(3)-O(3)#6  | 2.405(2)   | O(6)-Na(3)-O(5)        | 54.63(6)  |
| Na(3)-O(5)    | 2.926(2)   | O(6)-Na(3)-O(9)#7      | 141.52(8) |
| Na(3)-O(6)    | 2.3338(19) | O(6)-Na(3)-O(10)       | 51.34(6)  |
| Na(3)-O(9)#7  | 2.434(2)   | O(6)-Na(3)-O(13)#9     | 81.17(7)  |
| Na(3)-O(10)   | 2.998(2)   | O(6)-Na(3)-O(14)#8     | 113.03(7) |
| Na(3)-O(13)#9 | 2.512(2)   | O(9)#7-Na(3)-O(5)      | 140.44(7) |
| Na(3)-O(14)#8 | 2.383(2)   | O(9)#7-Na(3)-O(10)     | 90.24(6)  |
| Y(1)-O(1)#11  | 2.1812(17) | O(9)#7-Na(3)-O(13)#9   | 94.17(7)  |
| Y(1)-O(4)     | 2.1768(17) | O(13)#9-Na(3)-O(5)     | 125.19(6) |
| Y(1)-O(5)#10  | 2.5730(17) | O(13)#9-Na(3)-O(10)    | 78.09(6)  |
| Y(1)-O(6)#6   | 2.3751(17) | O(14)#8-Na(3)-O(3)#6   | 106.92(7) |
| Y(1)-O(7)#10  | 2.2965(17) | O(14)#8-Na(3)-O(5)     | 80.63(6)  |
| Y(1)-O(13)#12 | 2.2520(17) | O(14)#8-Na(3)-O(9)#7   | 59.87(6)  |
| Y(1)-O(15)#13 | 2.3553(16) | O(14)#8-Na(3)-O(10)    | 92.54(6)  |
| B(1)-O(1)     | 1.323(3)   | O(14)#8-Na(3)-O(13)#9  | 152.65(8) |
| B(1)-O(2)     | 1.383(3)   | O(1)#11-Y(1)-O(5)#10   | 89.38(6)  |
| B(1)-O(3)     | 1.414(3)   | O(1)#11-Y(1)-O(6)#6    | 107.76(6) |
| B(2)-O(3)     | 1.395(3)   | O(1)#11-Y(1)-O(7)#10   | 78.09(7)  |
| B(2)-O(4)     | 1.319(3)   | O(1)#11-Y(1)-O(13)#12  | 166.00(7) |
| B(2)-O(5)     | 1.394(3)   | O(1)#11-Y(1)-O(15)#13  | 98.45(6)  |
| B(3)-O(2)     | 1.451(3)   | O(4)-Y(1)-O(1)#11      | 87.62(7)  |
| B(3)-O(5)     | 1.479(3)   | O(4)-Y(1)-O(5)#10      | 87.19(6)  |
| B(3)-O(6)     | 1.464(3)   | O(4)-Y(1)-O(6)#6       | 84.75(6)  |
| B(3)-O(7)     | 1.493(3)   | O(4)-Y(1)-O(7)#10      | 140.16(6) |
| B(4)-O(6)     | 1.492(3)   | O(4)-Y(1)-O(13)#12     | 90.90(7)  |
| B(4)-O(8)     | 1.458(3)   | O(4)-Y(1)-O(15)#13     | 144.24(6) |
| B(4)-O(10)    | 1.472(3)   | O(6)#6-Y(1)-O(5)#10    | 160.68(6) |
| B(4)-O(15)#3  | 1.486(3)   | O(7)#10-Y(1)-O(5)#10   | 56.06(5)  |
| B(5)-O(7)     | 1.364(3)   | O(7)#10-Y(1)-O(6)#6    | 134.98(6) |
| B(5)-O(8)     | 1.350(3)   | O(7)#10-Y(1)-O(15)#13  | 75.22(6)  |
| B(5)-O(9)     | 1.365(3)   | O(13)#12-Y(1)-O(5)#10  | 76.63(6)  |
| B(6)-O(10)    | 1.355(3)   | O(13)#12-Y(1)-O(6)#6   | 85.94(6)  |
| B(6)-O(11)    | 1.401(3)   | O(13)#12-Y(1)-O(7)#10  | 94.38(6)  |
| B(6)-O(12)    | 1.351(3)   | O(13)#12-Y(1)-O(15)#13 | 90.88(6)  |

|                       |           |                       |            |
|-----------------------|-----------|-----------------------|------------|
| B(7)-O(9)#4           | 1.487(3)  | O(15)#13-Y(1)-O(5)#10 | 127.83(5)  |
| B(7)-O(12)            | 1.481(3)  | O(15)#13-Y(1)-O(6)#6  | 59.77(6)   |
| B(7)-O(14)            | 1.475(3)  | O(1)-B(1)-O(2)        | 121.8(2)   |
| B(7)-O(15)            | 1.473(3)  | O(1)-B(1)-O(3)        | 120.1(2)   |
| B(8)-O(11)            | 1.407(3)  | O(2)-B(1)-O(3)        | 118.1(2)   |
| B(8)-O(13)            | 1.336(3)  | O(4)-B(2)-O(3)        | 121.1(2)   |
| B(8)-O(14)            | 1.387(3)  | O(4)-B(2)-O(5)        | 120.8(2)   |
| O(1)#2-Na(1)-O(1)     | 69.62(7)  | O(5)-B(2)-O(3)        | 118.1(2)   |
| O(1)-Na(1)-O(5)#1     | 121.80(6) | O(2)-B(3)-O(5)        | 111.44(19) |
| O(1)#2-Na(1)-O(5)#1   | 106.81(7) | O(2)-B(3)-O(6)        | 109.4(2)   |
| O(1)#2-Na(1)-O(13)#3  | 142.78(7) | O(2)-B(3)-O(7)        | 111.89(19) |
| O(1)#2-Na(1)-O(14)#3  | 86.66(7)  | O(5)-B(3)-O(7)        | 101.47(18) |
| O(2)-Na(1)-O(1)#2     | 83.28(7)  | O(6)-B(3)-O(5)        | 114.1(2)   |
| O(2)-Na(1)-O(1)       | 53.18(6)  | O(6)-B(3)-O(7)        | 108.26(19) |
| O(2)-Na(1)-O(4)#1     | 121.04(7) | O(8)-B(4)-O(6)        | 113.82(19) |
| O(2)-Na(1)-O(5)#1     | 166.93(7) | O(8)-B(4)-O(10)       | 111.74(19) |
| O(2)-Na(1)-O(13)#3    | 110.67(7) | O(8)-B(4)-O(15)#3     | 110.53(18) |
| O(2)-Na(1)-O(14)#3    | 110.10(7) | O(10)-B(4)-O(6)       | 107.24(18) |
| O(4)#1-Na(1)-O(1)     | 69.94(6)  | O(10)-B(4)-O(15)#3    | 108.49(19) |
| O(4)#1-Na(1)-O(1)#2   | 91.43(7)  | O(15)#3-B(4)-O(6)     | 104.64(18) |
| O(4)#1-Na(1)-O(5)#1   | 51.89(5)  | O(7)-B(5)-O(9)        | 120.9(2)   |
| O(4)#1-Na(1)-O(13)#3  | 108.18(7) | O(8)-B(5)-O(7)        | 118.9(2)   |
| O(4)#1-Na(1)-O(14)#3  | 128.21(7) | O(8)-B(5)-O(9)        | 120.2(2)   |
| O(13)#3-Na(1)-O(1)    | 146.45(7) | O(10)-B(6)-O(11)      | 113.7(2)   |
| O(13)#3-Na(1)-O(5)#1  | 66.37(6)  | O(12)-B(6)-O(10)      | 125.9(2)   |
| O(14)#3-Na(1)-O(1)    | 151.48(7) | O(12)-B(6)-O(11)      | 120.4(2)   |
| O(14)#3-Na(1)-O(5)#1  | 79.33(6)  | O(12)-B(7)-O(9)#4     | 105.13(18) |
| O(14)#3-Na(1)-O(13)#3 | 56.27(6)  | O(14)-B(7)-O(9)#4     | 108.50(19) |
| O(9)-Na(2)-O(10)#3    | 125.24(7) | O(14)-B(7)-O(12)      | 111.87(18) |
| O(9)-Na(2)-O(11)#3    | 85.69(6)  | O(15)-B(7)-O(9)#4     | 110.00(18) |
| O(9)-Na(2)-O(11)#5    | 115.46(7) | O(15)-B(7)-O(12)      | 109.85(19) |
| O(9)-Na(2)-O(12)#4    | 57.46(6)  | O(15)-B(7)-O(14)      | 111.29(19) |
| O(9)-Na(2)-O(15)      | 129.64(7) | O(13)-B(8)-O(11)      | 120.2(2)   |
| O(10)#3-Na(2)-O(11)#3 | 50.71(6)  | O(13)-B(8)-O(14)      | 122.4(2)   |
| O(10)#3-Na(2)-O(12)#4 | 169.29(8) | O(14)-B(8)-O(11)      | 117.4(2)   |
| O(10)#3-Na(2)-O(15)   | 59.43(6)  |                       |            |

---

Symmetry transformations used to generate equivalent atoms:

|                       |                       |                       |
|-----------------------|-----------------------|-----------------------|
| #1 $x+1, y-1, z$      | #2 $-x+2, -y+1, -z+2$ | #3 $-x+2, -y+1, -z+1$ |
| #4 $-x+1, -y+1, -z+1$ | #5 $x, y-1, z$        | #6 $-x+1, -y+2, -z+2$ |
| #7 $x, y+1, z$        | #8 $-x+1, -y+2, -z+1$ | #9 $-x+2, -y+2, -z+1$ |
| #10 $-x, -y+2, -z+2$  | #11 $x-1, y+1, z$     | #12 $x-1, y, z+1$     |
| #13 $x-1, y+1, z+1$   | #14 $x+1, y, z-1$     | #14 $x+1, y, z-1$     |

**Table S4** The compounds reported in the Na<sub>2</sub>O-Y<sub>2</sub>O<sub>3</sub>-B<sub>2</sub>O<sub>3</sub> ternary system.

| Compound                                                        | Space group             | Cationic coordination                                                    | FBB             |
|-----------------------------------------------------------------|-------------------------|--------------------------------------------------------------------------|-----------------|
| Na <sub>3</sub> Y(BO <sub>3</sub> ) <sub>2</sub>                | <i>P2<sub>1</sub>/c</i> | NaO <sub>4</sub> , NaO <sub>6</sub> , NaO <sub>7</sub> , YO <sub>7</sub> | BO <sub>3</sub> |
| Na <sub>2</sub> Y <sub>2</sub> O(BO <sub>3</sub> ) <sub>2</sub> | <i>P2<sub>1</sub>/c</i> | NaO <sub>6</sub> , YO <sub>8</sub>                                       | BO <sub>3</sub> |
| Na <sub>3</sub> Y <sub>3</sub> (BO <sub>3</sub> ) <sub>4</sub>  | <i>P6<sub>3</sub>mc</i> | NaO <sub>7</sub> , YO <sub>8</sub>                                       | BO <sub>3</sub> |

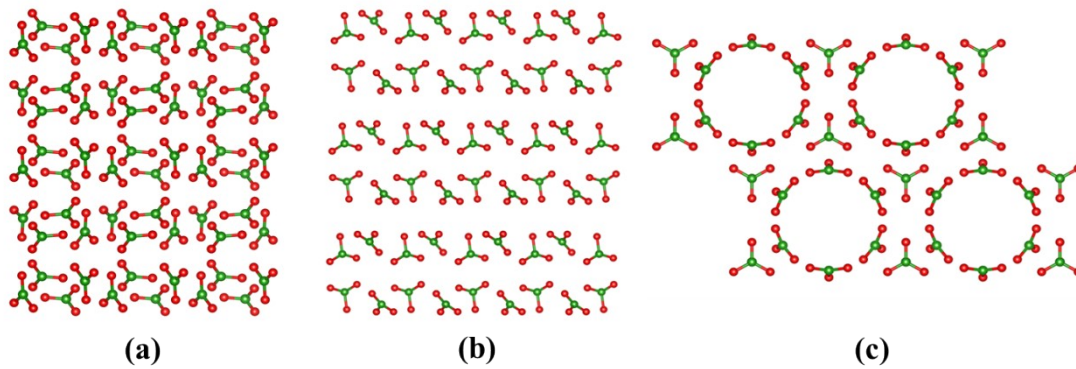

**Figure S1**  $\text{BO}_3$  anion frames in (a)  $\text{Na}_3\text{Y}(\text{BO}_3)_2$ , (b)  $\text{Na}_2\text{Y}_2\text{O}(\text{BO}_3)_2$ , and (c)  $\text{Na}_3\text{Y}_3(\text{BO}_3)_4$ .
